#### EDITORIAL NOTE

## Editorial Note: Investigation on cement-improved phyllite based on the vertical vibration compaction method

The *PLOS One* Editors

The *PLOS One* Editors issue this Editorial Note because this article [1] was identified as one of a series of submissions for which we have concerns about aspects of the peer review process. Readers are advised to interpret the article [1] with caution.

The Editors have no evidence of any author involvement in the peer review concerns.

#### Reference

1. Jiang Y, Fan J, Yi Y, Tian T, Yuan K, Deng C. Investigation on cement-improved phyllite based on the vertical vibration compaction method. *PLoS One*. 2021;16(3):e0247599. <https://doi.org/10.1371/journal.pone.0247599> PMID: [33657170](https://pubmed.ncbi.nlm.nih.gov/33657170/)

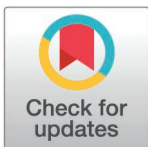

---

#### OPEN ACCESS

**Citation:** The *PLOS One* Editors (2026) Editorial Note: Investigation on cement-improved phyllite based on the vertical vibration compaction method. *PLoS One* 21(5): e0348539. <https://doi.org/10.1371/journal.pone.0348539>

**Published:** May 5, 2026

**Copyright:** © 2026 The *PLOS One* Editors. This is an open access article distributed under the terms of the [Creative Commons Attribution License](https://creativecommons.org/licenses/by/4.0/), which permits unrestricted use, distribution, and reproduction in any medium, provided the original author and source are credited.
